# Supplementary material for: Unusual Oligomeric Laccase-like Oxidases from Ascomycete Curvularia geniculata VKM F-3561 Polymerizing Phenylpropanoids and Phenolic Compounds under Neutral Environmental Conditions
Source: MDPI journal article supplement (doi:10.3390/microorganisms11112698), 2023-11-03
Supplement: s1 [file s1]

**Supplementary material, Table 1.** Primers used in the work

| Primers               | Sequence                  | Annealing temperature, °C |
|-----------------------|---------------------------|---------------------------|
| Lac2FOR               | GGIACIWIIITGGTAYCAYWSICA  | 49                        |
| Lac3REV               | CCRTGIWKRTGIAWIGGRTGIGG   | 49                        |
| F3561-20d-SON1-GSP1-F | GATGGCAATGTCACCTTC        | 63                        |
| F3561-20d-SON1-GSP2-F | CGTCACGTGTTTGCAGTC        | 55                        |
| F3561-20d-SON2-GSP1-R | TCTTGCATGAACGGCAG         | 63                        |
| F3561-20d-SON2-GSP2-R | GCATGAAACCAGTCGGTC        | 65                        |
| F3561-20d-SON3-GSP1-R | GGCCACTTGAGGTCCATATCGGTGT | 60                        |
| F3561-20d-SON3-GSP2-R | GTCATCGTACCAGCAGTCTCTTGAT | 63                        |
| F3561-20d-Lcc-F       | ATGGTCTTTTCAATCCCGAGGGC   | 60                        |
| F3561-20d-Lcc-R       | CTAGCGACGACGCAGACCAGA     | 60                        |

**Supplementary material, Table 2.** The scheme of purification of the *C. geniculata* VKM F-3561 oxidases (the activity was measured in the reaction with ABTS at pH5.0)

| <b>Purification step</b> | <b>Total protein, mg</b> | <b>Total activity, U</b> | <b>Specific activity, U/mg</b> | <b>Purification, fold</b> | <b>Yield, %</b> |
|--------------------------|--------------------------|--------------------------|--------------------------------|---------------------------|-----------------|
| <i>Culture liquid</i>    | 380.0                    | 184.0                    | 0.3                            | 1.0                       | 100.0           |
| <i>DE-52</i>             |                          |                          |                                |                           |                 |
| oxidase I                | 45.0                     | 27.0                     | 0.6                            | 2.0                       | 14.7            |
| oxidase II               | 73.0                     | 109.5                    | 1.5                            | 5.0                       | 59.5            |
| <i>Q-Sepharose</i>       |                          |                          |                                |                           |                 |
| oxidase I                | 10.3                     | 21.6                     | 2.1                            | 7.0                       | 11.7            |
| oxidase II               | 18.1                     | 103.2                    | 5.7                            | 19.0                      | 56.1            |
| <i>Resource Q</i>        |                          |                          |                                |                           |                 |
| oxidase I                | -                        | -                        | -                              | -                         | -               |
| oxidase II               | 10.7                     | 95.2                     | 8.9                            | 29.7                      | 51.7            |
| <i>Superdex 200</i>      |                          |                          |                                |                           |                 |
| oxidase I                | 1.3                      | 20.0                     | 15.4                           | 51.3                      | 10.9            |
| oxidase II               | 3.7                      | 84.7                     | 22.9                           | 76.3                      | 46.0            |

**Supplementary material, Figure 1.** Dependence of an activity of the purified laccase-like oxidase I of *C. geniculata* VKM F-3561 on temperature (in reaction with ABTS as a substrate) and pH (in the reaction with ABTS, syringaldazine, 2,6-dimethoxyphenol, ferulic acid, and coniferyl alcohol). The error bars represent the standard deviation.

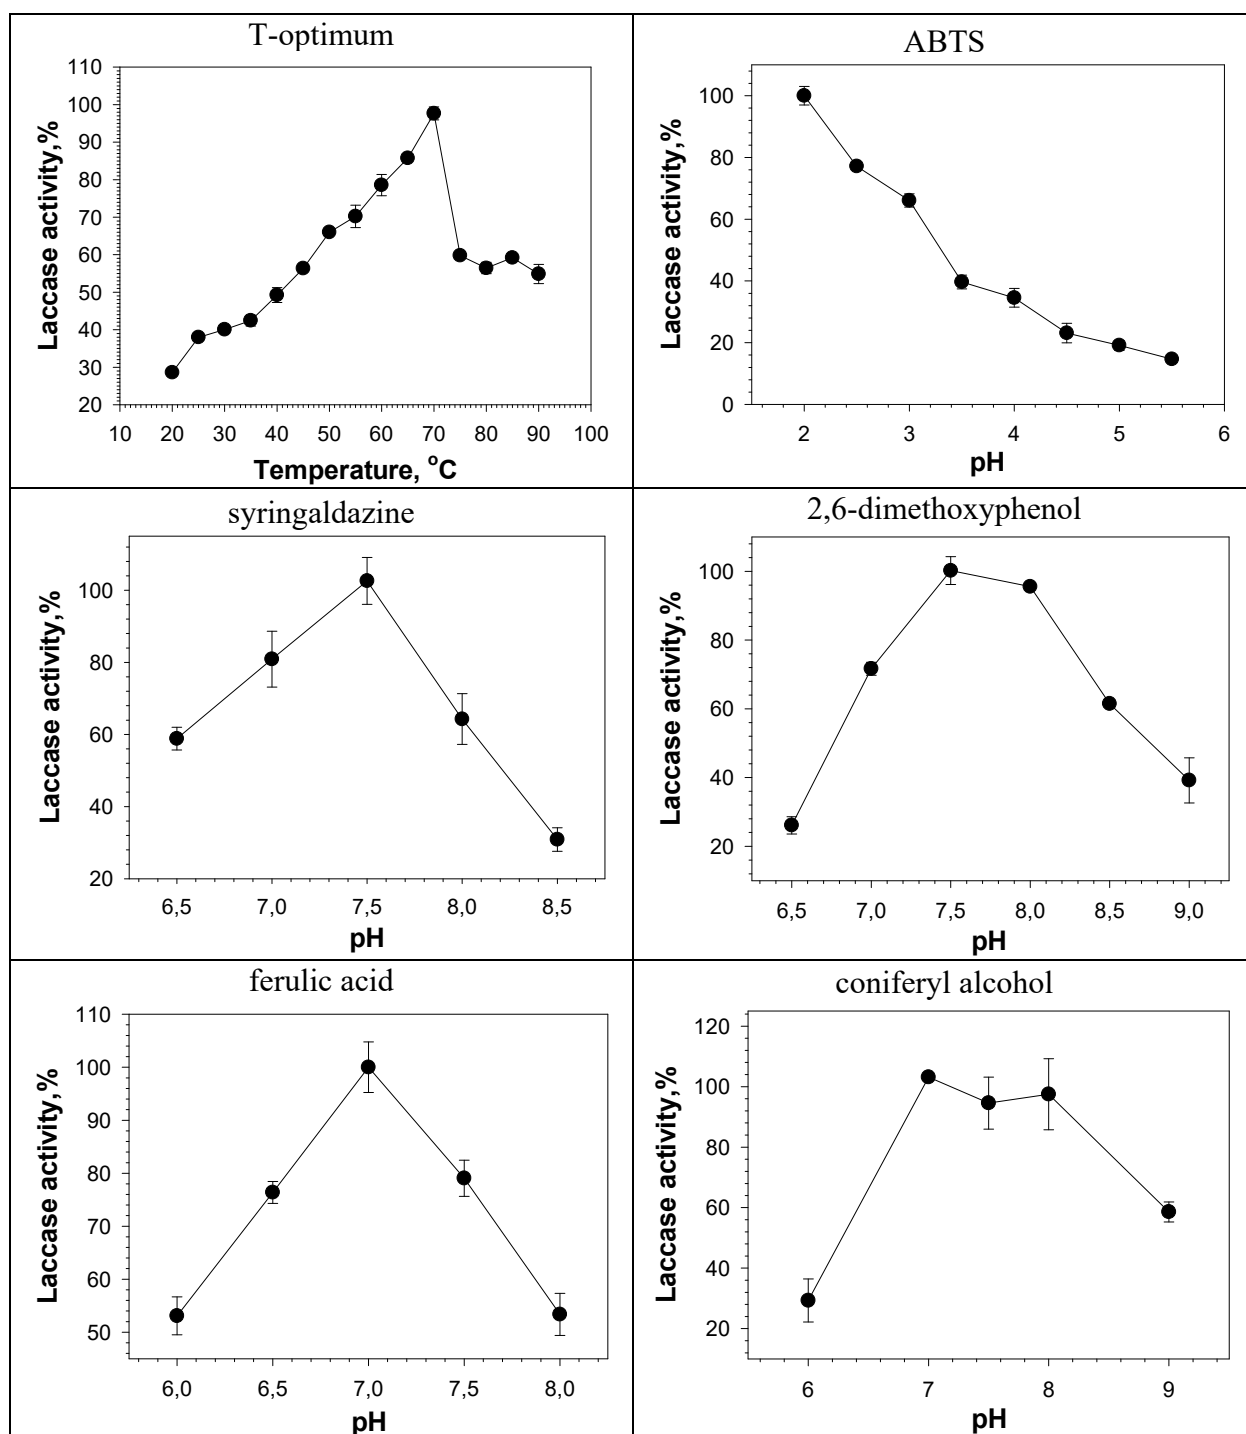

**Supplementary material, Figure 2.** Dependence of an activity of the purified laccase-like oxidase II of *C. geniculata* VKM F-3561 on temperature (in the reaction with ABTS as a substrate) and pH (in reaction with ABTS, syringaldazine, 2,6-dimethoxyphenol, ferulic acid, and coniferyl alcohol). The error bars represent the standard deviation.

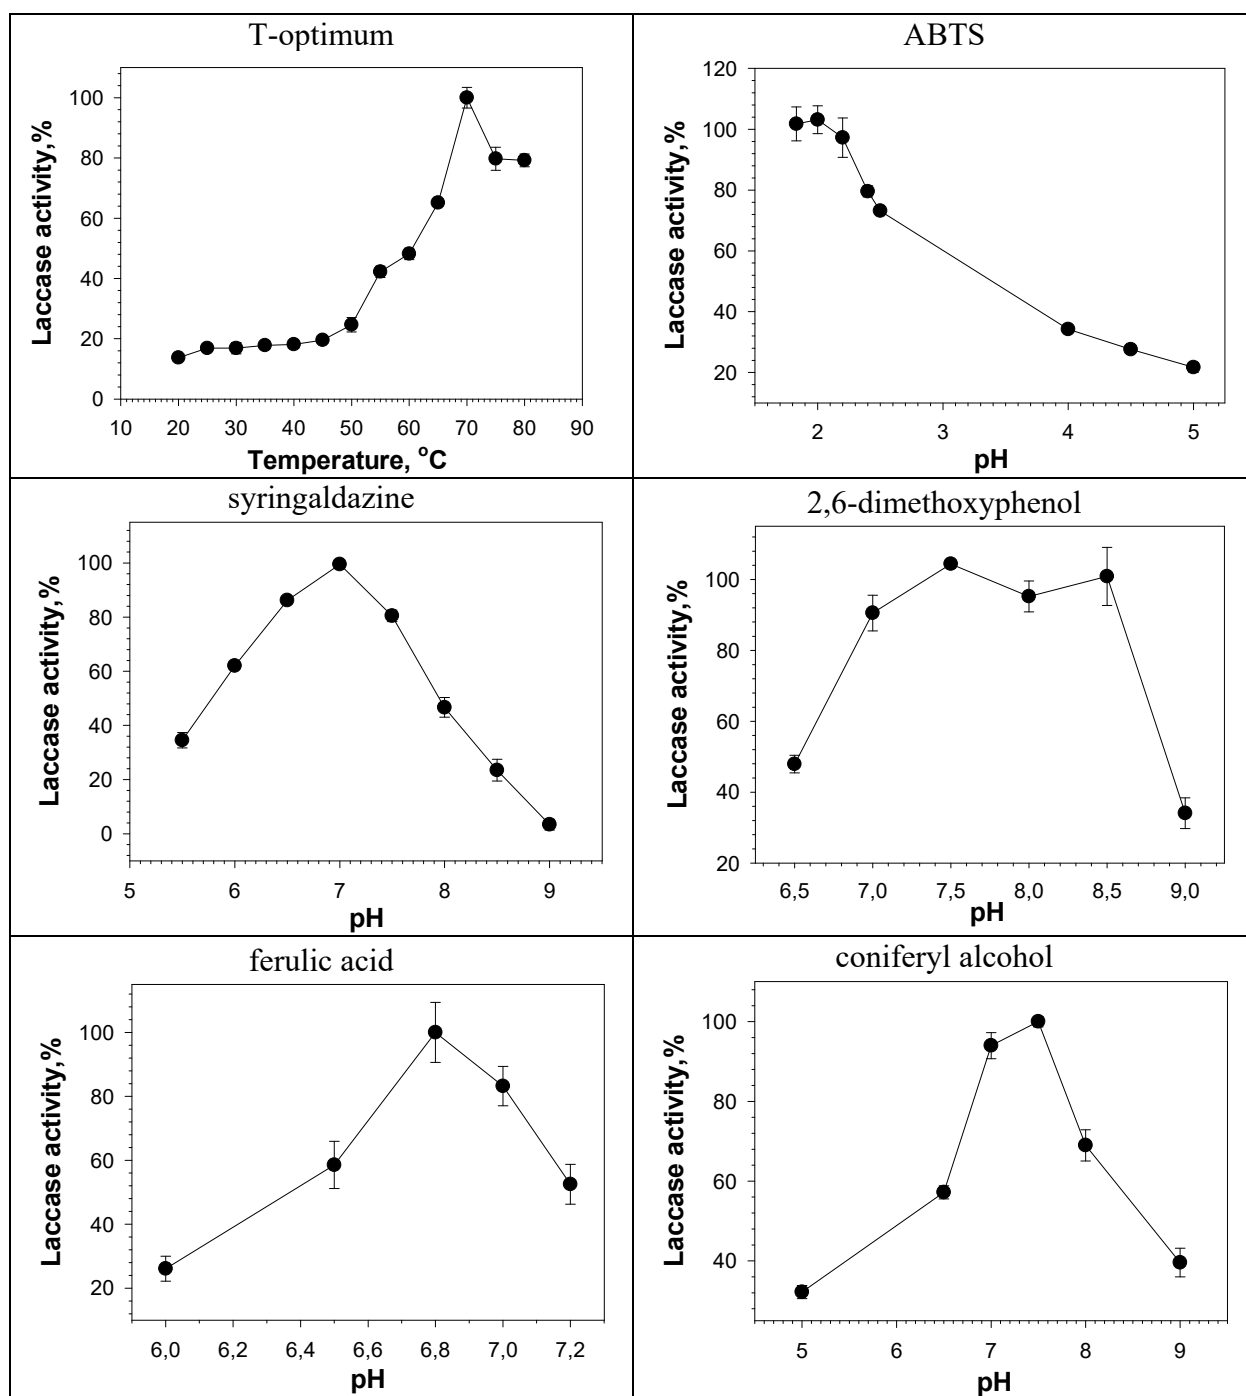

1 ATGGTCTTTTCAATCCCGAGGGCGGTACCGCACTGGGGCTTCTCTGCCTACTGTACCTCTGTTGCCCTATCT 75  
M V F S I P R A V T A L G L L L P T V T S V A L S  
76 TATGAAGGCCGCGCACCCATAACACCTCCCGTCCCTTGGAAAGATACTGGACTCTTCTCTGGACACGTGAGCCGA 150  
Y E G R A P I T P P V P W K D T G L F S G H V S R  
151 TCAGGATATCCAACCTTTTGCATAATGGTCCACAATCAAGAGACTGCTGGTACGATGACTTCAACATCGACACC 225  
S G Y P T F C N N G P Q S R D C W Y D D F N I D T  
226 GATATGGACCTCAAGTGGCCCGACACTGGCAATACAGTCAAGTACCACCTGACTATCACAACTCTACCGGTGCT 300  
D M D L K W P D T G N T V K Y H L T I T N S T G A  
301 CCCGATGGTTTCGAGAGACCAATATCCTTGATCAACGGTCAATACCCAGGACCAGTAAAGTGTATACAAACGATA 375  
P D G F E R P I S L I N G Q Y P G P  
376 **CCGATAGTTCTTCTCTAATGAAATGTAGACAATACTGGCTGATTGGGGAGACGATTTGGAAATCACTGTTACCAA** 450  
интрон T I L A D W G D D L E I T V T N  
451 CGGTTTGGAGAACAACGGAACAGGTATTTCATTGGCATGGATTGCGACAACCTCGGATCAAACGAGCAAGATGGAGT 525  
G L E N N G T G I H W H G L R Q L G S N E Q D G V  
526 GAACGGCATCACTGAATGCCCAATCGCGCCCGGCGACTCCAAAGTCTACAAGTTCAAGGCAACACAATACGGCAC 600  
N G I T E C P I A P G D S K V Y K F K A T Q Y G T  
601 CTCTGTAAGTATCAGAAATTGTCTGACATGTTGAATGAAGACGACTGACCGTCACAGTGGTATCACACGCACTAC 675  
S интрон W Y H T H Y  
676 TCCGTACAGTATGGCGACGGTATTGTAGGACCTTTAATCATCCGAGGACCTGCAACAGCAAACACTAGATATTGAT 750  
S V Q Y G D G I V G P L I I R G P A T A N Y D I D  
751 CTCGGCGCCCTTCCAATGACCGACTGGTTTTCATGCGACCACTTTCACTGTGAACGCTGCTGCCGTTTCATGCAAGA 825  
L G A L P M T D W F H A T T F T V N A A A V H A R  
826 GGTCTCCAACCTCGGACAACGTTCTGATCAACGGCTCCATGACTTCGTCTTTTGGTGGAAATACGCTGAAACA 900  
G P P T A D N V L I N G S M T S S F G G K Y A E T  
901 ATTCTAACCCCTGGAAAGGCCCACTTGTGCGCCTGATGAACGTTGGCATCAACAATATCTCCATGTCGGTCTC 975  
I L T P G K A H L L R L M N V G I N N Y L H V G L  
976 GATGGACACAAGTTCAGGTCAATTCGCGGACTTTACCCCATCGAACCATTCTACACCGACAACCTGGTTCTC 1050  
D G H K F Q V I S A D F T P I E P F Y T D N L V L  
1051 GCAGTCGGTCAACGCTATGAAGTCATCATTAAATGCAACCGAGGCTGTTGGTAACACTGCGCTTCGCGTGGTACT 1125  
A V G Q R Y E V I I N A T E A V G N Y W L R V G T  
1126 GGTGGTTCTTGTGATGGTCCCAACGCCAACGCGGCAAACATCAGGAGTATCTTCCGATACGCTGGCGCCCTGCT 1200  
G G S C D G P N A N A A N I R S I F R Y A G A P A  
1201 ATGGAGCCCAACACGACTGGTACCCTTCCATCGGGCTGCTACGATGAGACTGTTGTGCCCCACGCCAAACAACT 1275  
M E P N T T G T L P S G C Y D E T V V P H A K T T  
1276 GTTCCTCAGGACATGCCTGAATTGCTCAGTGTGGGCTTCAACCCCAACTGGACCAGCGACGTGACGCAAAACAG 1350  
V P Q D M P E L L S V G F N P N W T S D V T Q N Q  
1351 GGCTTGGTTCAATGGCTTGTCAACGCGACCCCTATGAATGTCGACCTTGAAGTCCCCACACTACAGTCAGTATTG 1425  
G L V Q W L V N G D P M N V D L E V P T L Q S V L  
1426 GATGGCAATGTCACCTTCGGAACAACCGTCACGTGTTTGCAGTCGACGAGACAAACAAGGTATGTCATCTCTTG 1500  
D G N V T F G N N R H V F A V D E T N K  
1501 **CGCTCGATATCATTCTTCCGTGACTAACACAACACTCCAGTGGCAATACTGGGTCAATCAACAAAACAGCTCCAA** 1575  
интрон W Q Y W V I Q Q N S S N  
1576 CCCAGCCCTTCCCCACCCCATCCACCTTCACGGCCACGACTTCTACGTCTCGCCGACGAAGAAAACGAGTCTG 1650  
P A L P H P I H L H G H D F Y V L A Q Q E N A V W  
1651 GAACGGCGACATTTCCACCTTGAAGACCGACAACCCCATCCGTGCGATACAGCCGACCTTCCCGCCAACGGCTA 1725  
N G D I S T L K T D N P I R R D T A D L P A N G Y  
1726 CCTGGTCCTTGCTTTCGAGTCTGACAACCCAGGTGCATGGCTCATGCACTGCCACATCCCTTCCACGTTGCCGC 1800  
L V L A F E S D N P G A W L M H C H I P F H V A A  
1801 TGGTCTTGGCGTCCAGTTCCTGGAACGCCAGTCCGAAATCAAGGCCAGGATGGATTTGCAGAGATGAAGAGGAC 1875  
G L G V Q F L E R Q S E I K A Q D G F A E M K R T  
1876 CTGTGCAAACTGGAAGTCTTGGCGCTACCAGTTCATCCCAATGGTATCTTATTCCTGGTGACTCTGGTCTGCG 1950  
C A N W K S W R Y Q F H P N G I L F P G D S G L R  
1951 TCGTCGCTAG 1960  
R R \*

**Supplementary material, Figure 3.** Nucleotide sequence of the laccase gene and translated amino acid sequence of the laccase from the fungus *C. geniculata* VKM F-3561. The intron is shown in bold. The putative signal peptide is shaded, possible N-glycosylation sites are in rectangles. The conservative amino acid sequences responsible for the binding of copper ions in the active site of the enzyme are underlined.
